# Supplementary material
Source: MDPI journal article supplement (https://www.mdpi.com/1999-4907/13/5/760)

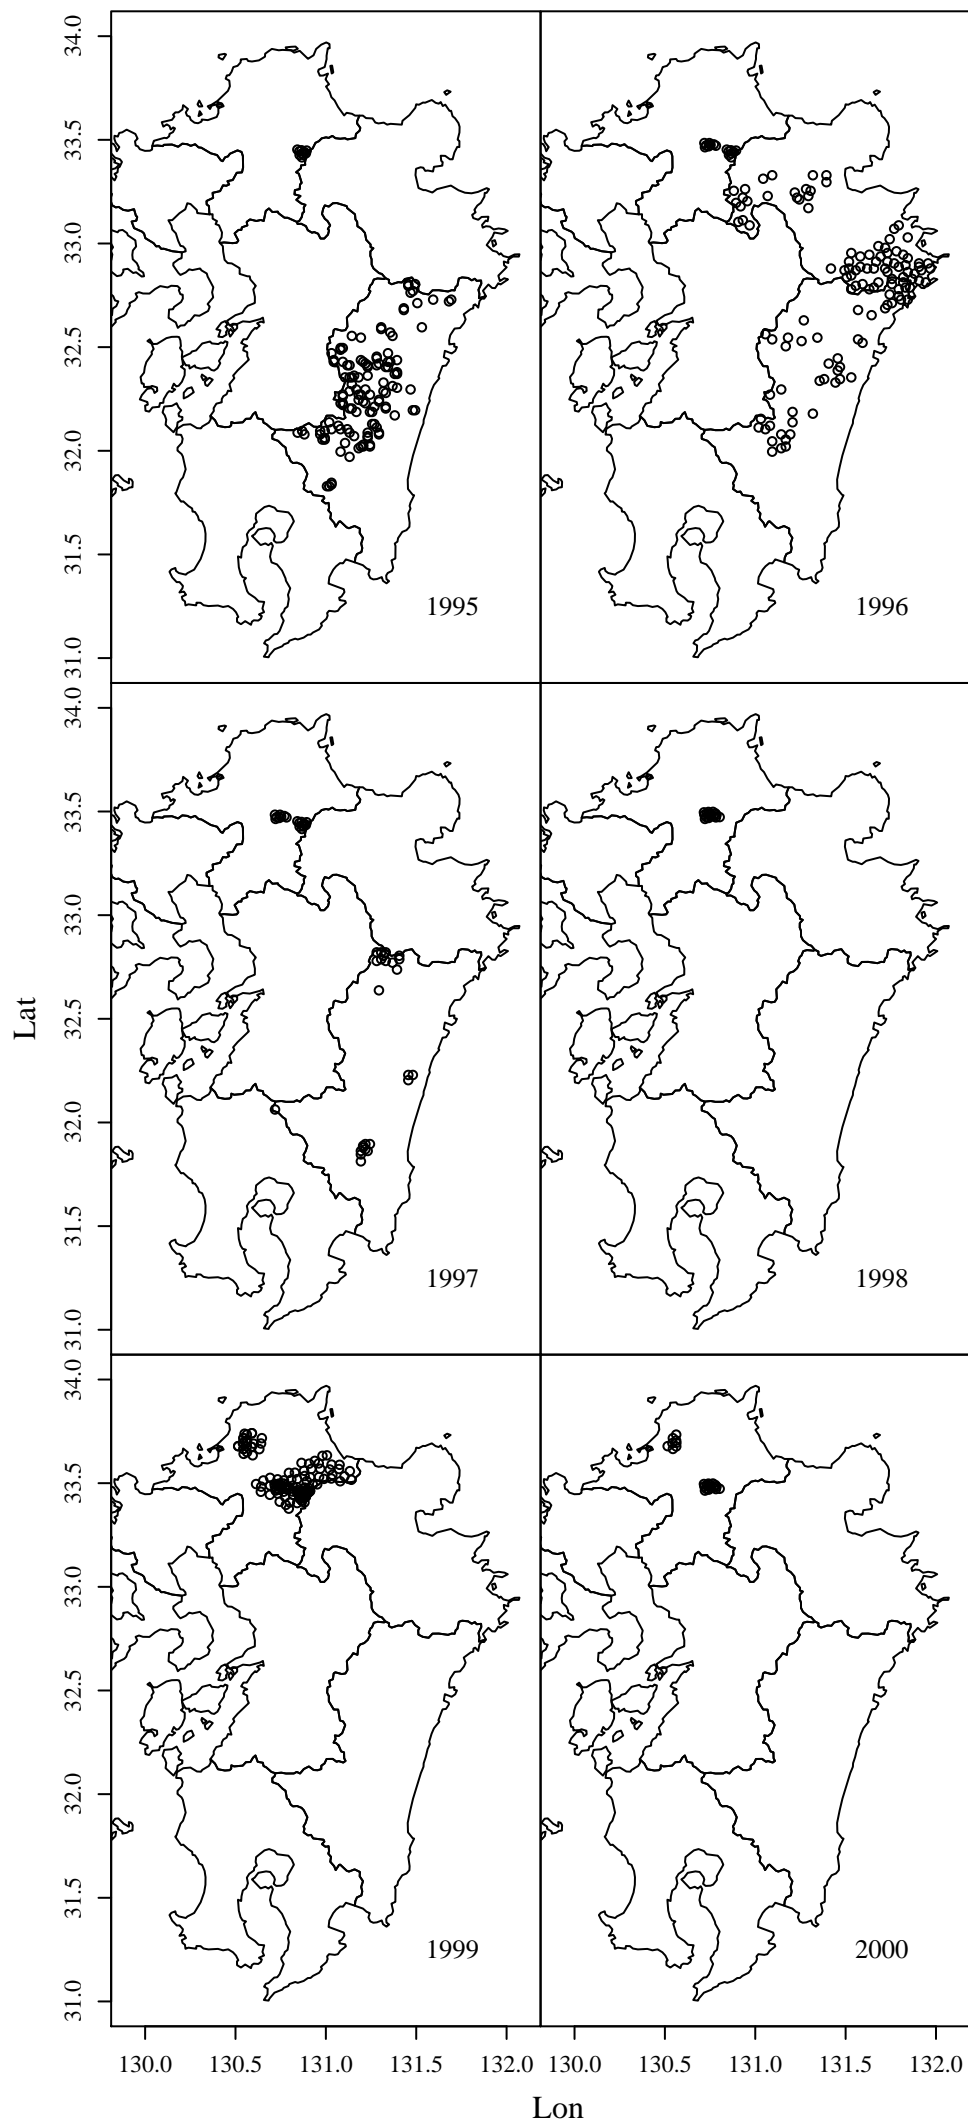

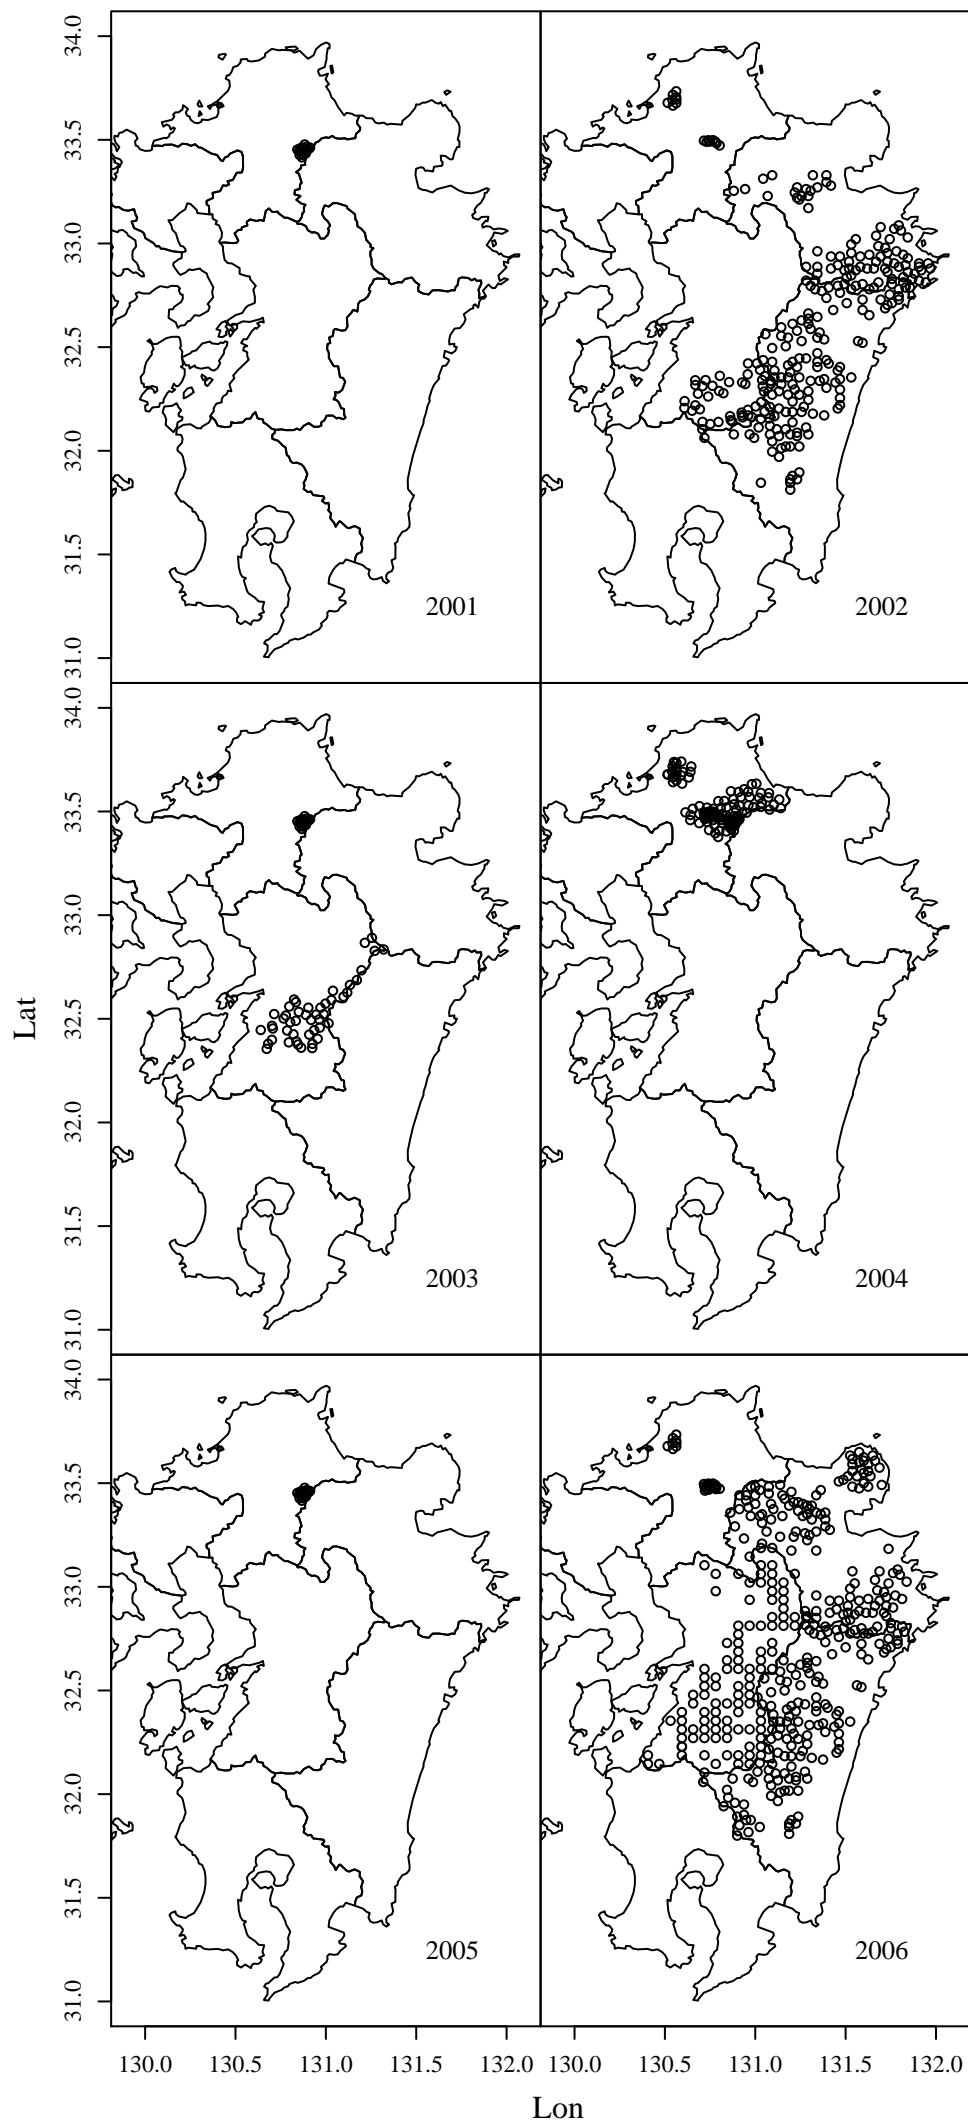

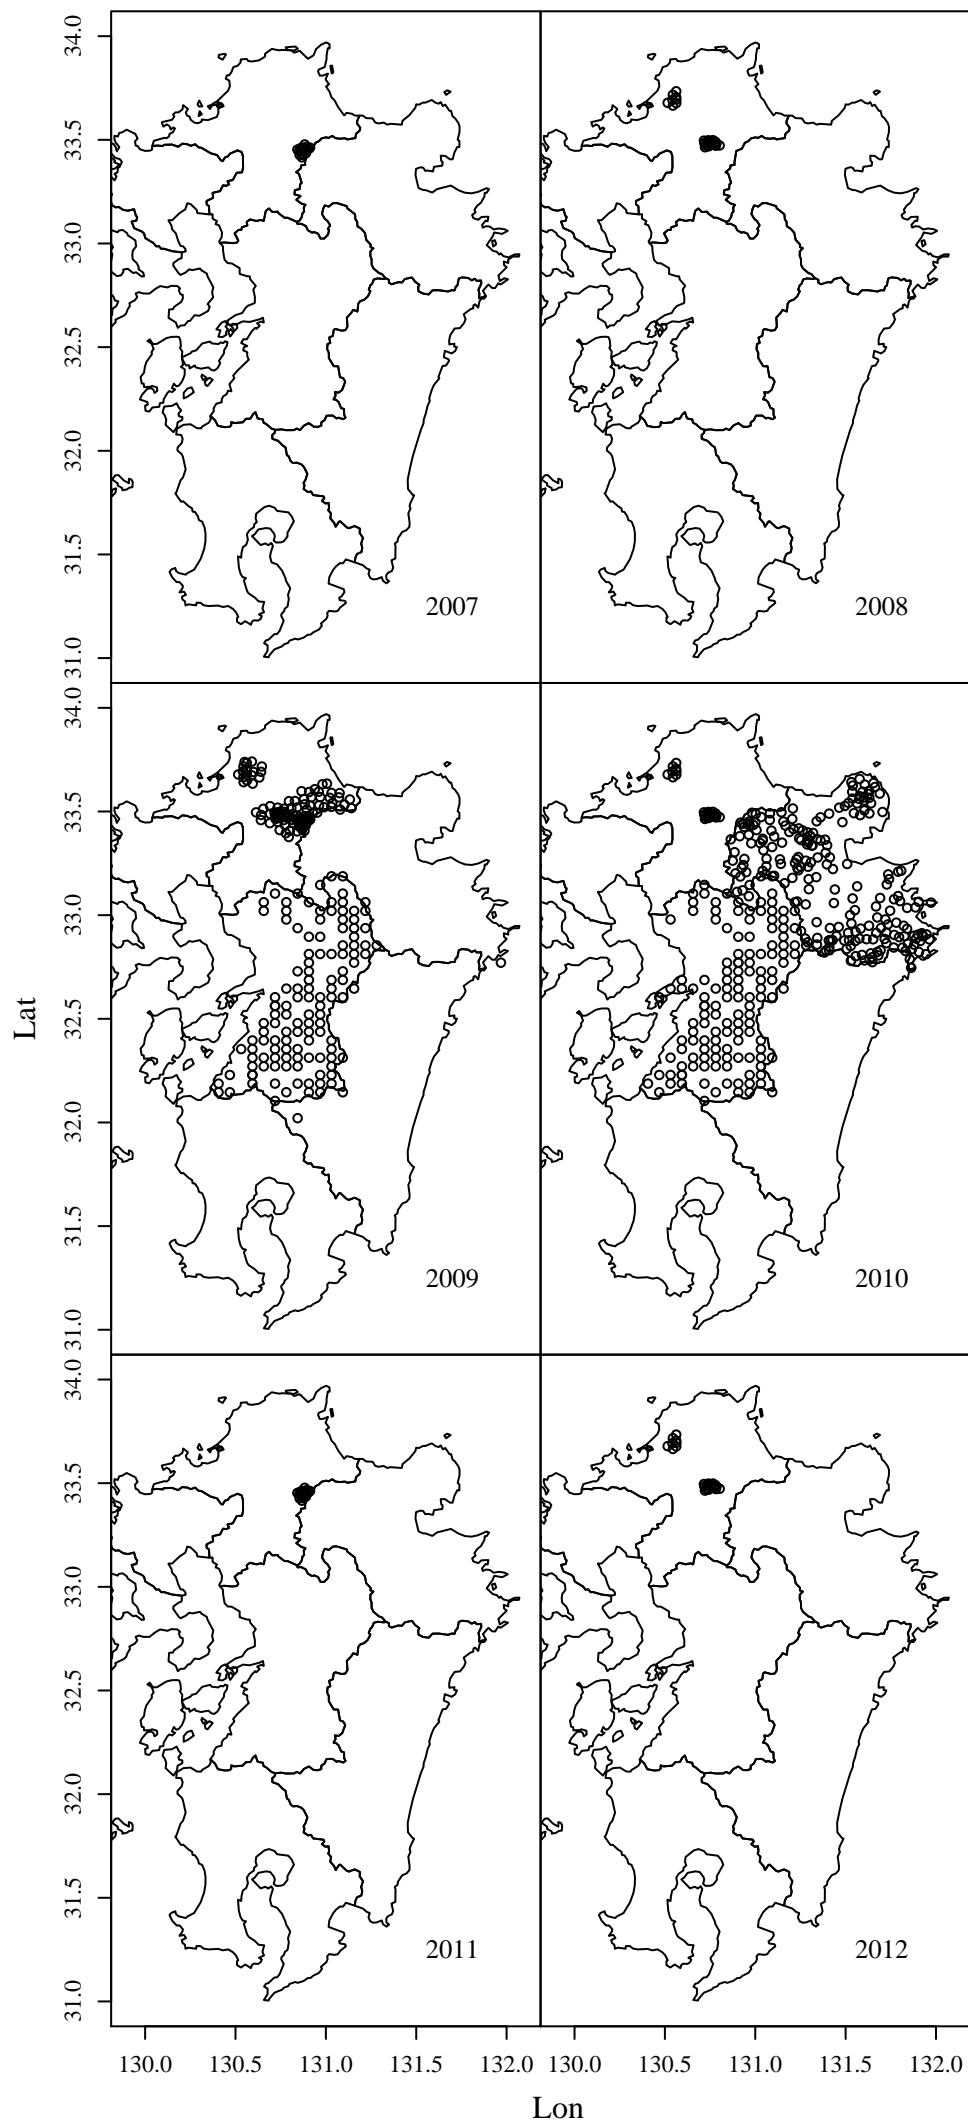

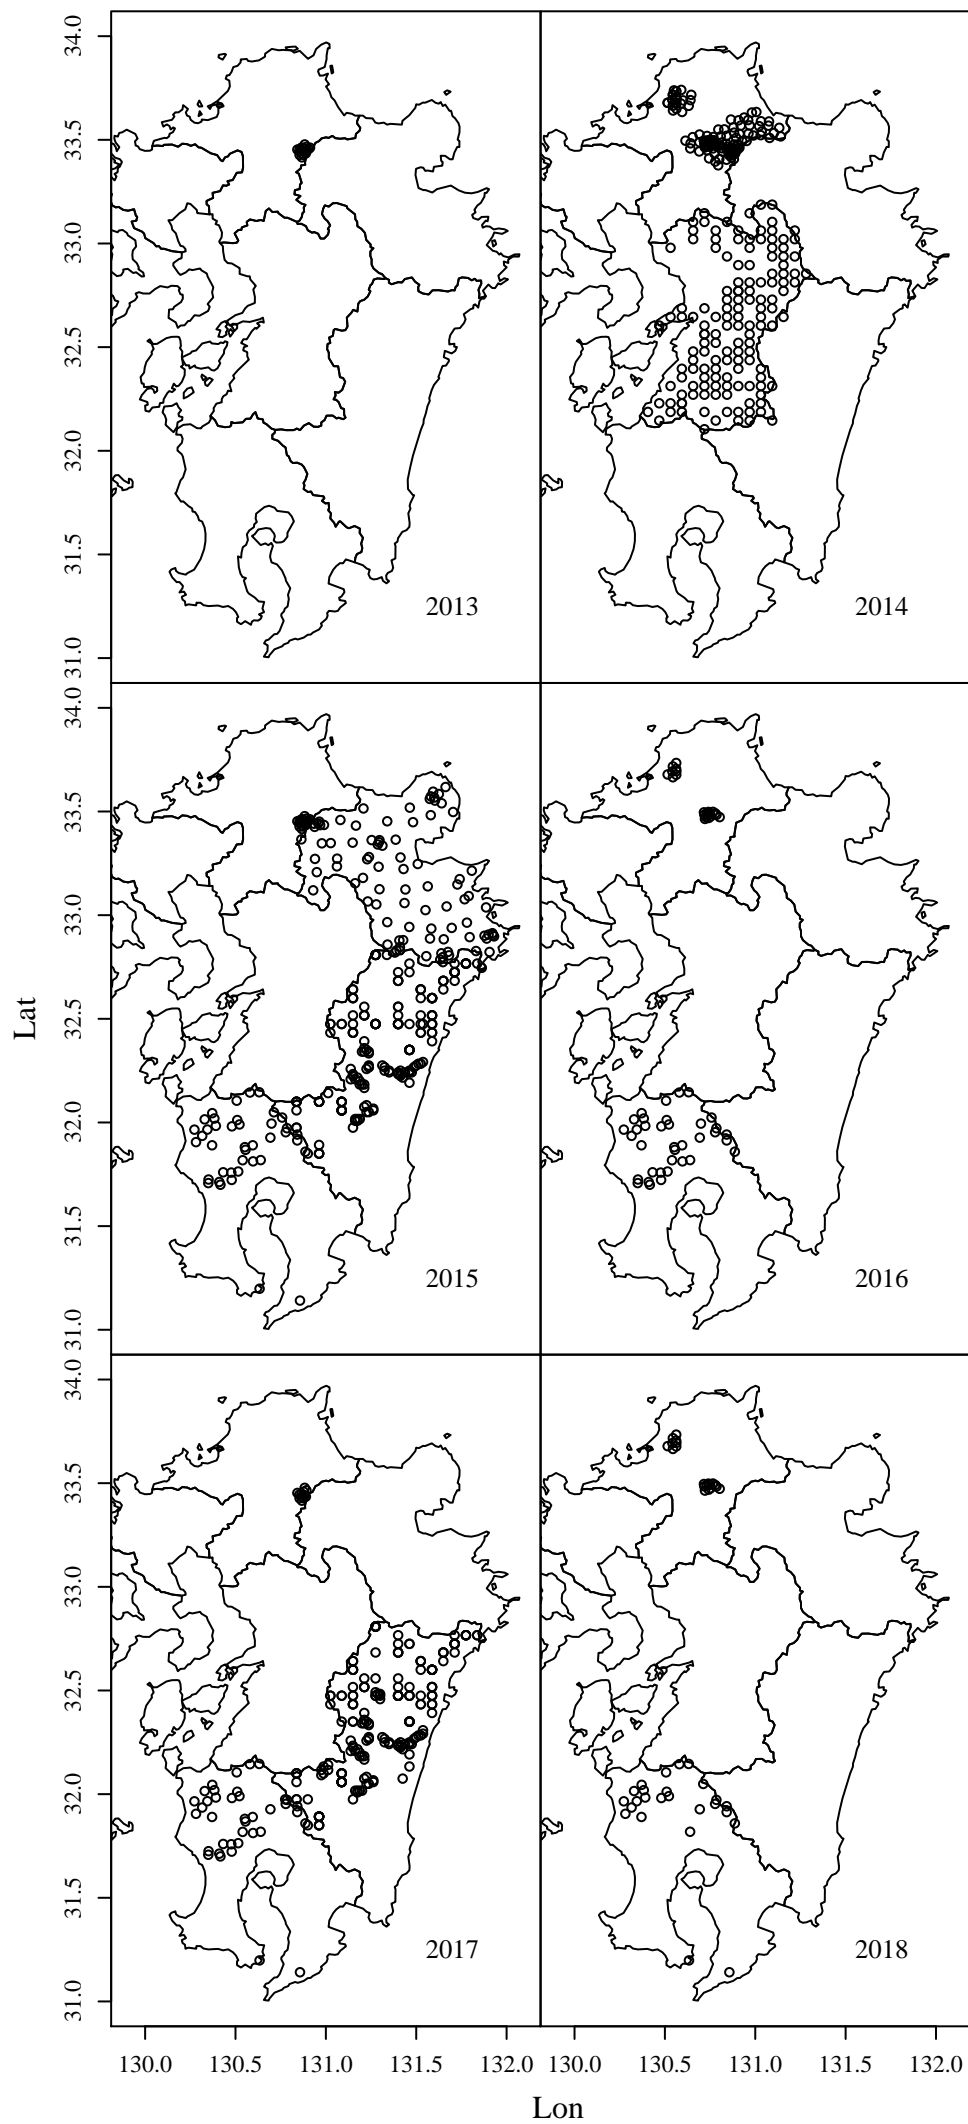

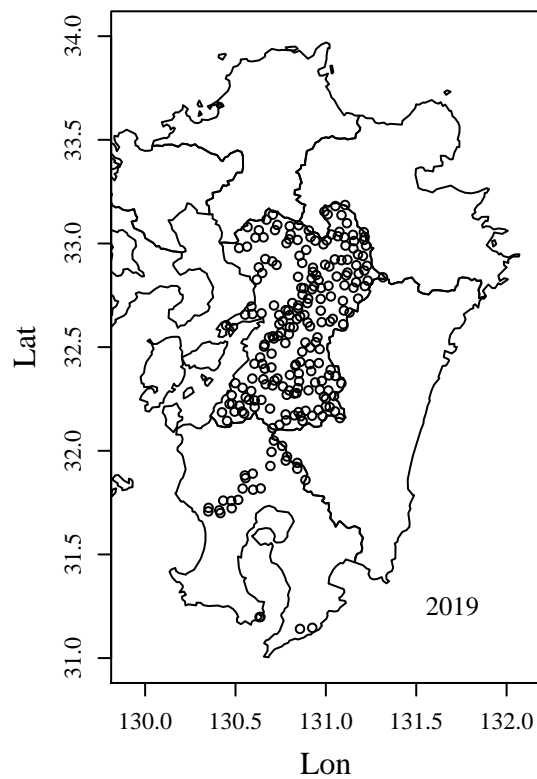

Supporting information 1. Plots of fecal pellet count surveys  
in each year.

Supplement: s1 [file s1]
